# Supplementary material for: Novel Ascorbic Acid Co-Crystal Formulations for Improved Stability
Source: MDPI journal article supplement (doi:10.3390/molecules27227998), 2022-11-18
Supplement: s1 [file s1]

# Supporting Information for

## Novel Ascorbic Acid Co-Crystal Formulations for Improved Stability

Hui Zhang <sup>1,†</sup>, Huahui Zeng <sup>2,†</sup>, Mengfei Li <sup>1,2</sup>, Yagang Song <sup>2</sup>, Shuo Tian <sup>2</sup>, Jing Xiong <sup>3</sup>, Lan He <sup>3</sup>, Yang Liu <sup>3,\*</sup> and Xiangxiang Wu <sup>1,2,\*</sup>

<sup>1</sup> Pharmacy College, Henan University of Chinese Medicine, Zhengzhou 450046, China

<sup>2</sup> Academy of Chinese Medicine Sciences, Henan University of Chinese Medicine, Zhengzhou 450046, China

<sup>3</sup> National Institutes for Food and Drug Control, Beijing 102629, China

\* Correspondence: wuxx-415@126.com (X.W.); yangliu@nifdc.org.cn (Y.L.); Tel.: +86-371-65680206 (X.W.); +86-10-53851571 (Y.L.)

† These authors contributed equally to this work.

## Table of Contents

**Table S1. selected bond lengths (Å) and bond angles (°).**

**Table S2. Hydrogen bond length (Å) and bond angle (°).**

**Table S1. selected bond lengths (Å) and bond angles (°).**

|                   |           |                   |           |
|-------------------|-----------|-------------------|-----------|
| C(1)-C(2)         | 1.515(9)  | C(13)-C(14)       | 1.347(9)  |
| C(2)-C(3)         | 1.378(9)  | C(13)-C(16)       | 1.450(9)  |
| C(2)-C(6)         | 1.397(9)  | C(14)-C(15)       | 1.495(9)  |
| C(3)-C(4)         | 1.384(9)  | C(15)-C(17)       | 1.529(8)  |
| C(5)-C(6)         | 1.383(9)  | C(17)-C(18)       | 1.503(10) |
| C(19)-C(20)       | 1.389(10) | O(12)-C(12)       | 1.279(8)  |
| C(20)-C(21)       | 1.382(9)  | O(13)-C(12)       | 1.225(8)  |
| C(21)-C(22)       | 1.390(9)  | N(2)-C(7)         | 1.338(9)  |
| C(21)-C(24)       | 1.517(9)  | N(2)-C(11)        | 1.328(9)  |
| C(22)-C(23)       | 1.387(10) | C(7)-C(8)         | 1.385(10) |
| N(1)-C(4)         | 1.333(8)  | C(8)-C(9)         | 1.379(9)  |
| N(1)-C(5)         | 1.341(8)  | C(9)-C(10)        | 1.382(9)  |
| N(3)-C(19)        | 1.344(9)  | C(9)-C(12)        | 1.525(9)  |
| N(3)-C(23)        | 1.331(9)  | C(10)-C(11)       | 1.386(10) |
| O(1)-C(24)        | 1.237(8)  | O(14)-C(29)       | 1.332(8)  |
| O(2)-C(24)        | 1.260(7)  | O(15)-C(30)       | 1.223(8)  |
| O(3)-C(1)         | 1.235(8)  | O(16)-C(27)       | 1.458(7)  |
| O(4)-C(1)         | 1.275(8)  | O(16)-C(30)       | 1.360(8)  |
| O(5)-C(16)        | 1.215(7)  | O(17)-C(26)       | 1.425(8)  |
| O(6)-C(13)        | 1.346(8)  | O(18)-C(28)       | 1.322(8)  |
| O(7)-C(15)        | 1.444(7)  | O(19)-C(25)       | 1.420(8)  |
| O(7)-C(16)        | 1.355(8)  | C(25)-C(26)       | 1.523(9)  |
| O(8)-C(14)        | 1.335(8)  | C(25)-C(27)       | 1.524(8)  |
| O(9)-C(17)        | 1.409(8)  | C(27)-C(28)       | 1.496(9)  |
| O(10)-C(18)       | 1.401(11) | C(28)-C(29)       | 1.362(8)  |
| O(11)-C(18)       | 1.281(13) | C(29)-C(30)       | 1.440(9)  |
| O(22)-C(34)       | 1.314(8)  | O(20)-C(31)       | 1.430(8)  |
| O(23)-C(35)       | 1.353(7)  | O(21)-C(32)       | 1.417(8)  |
| C(32)-C(33)       | 1.521(8)  | O(24)-C(36)       | 1.218(7)  |
| C(33)-C(34)       | 1.501(9)  | O(25)-C(33)       | 1.460(7)  |
| C(34)-C(35)       | 1.357(8)  | O(25)-C(36)       | 1.363(7)  |
| C(35)-C(36)       | 1.440(9)  | C(31)-C(32)       | 1.514(9)  |
| C(23)-N(3)-C(19)  | 122.6(6)  | C(10)-C(9)-C(12)  | 119.8(6)  |
| N(3)-C(19)-C(20)  | 119.3(6)  | C(9)-C(10)-C(11)  | 118.8(6)  |
| C(21)-C(20)-C(19) | 119.7(6)  | N(2)-C(11)-C(10)  | 119.6(6)  |
| C(20)-C(21)-C(22) | 119.2(6)  | O(12)-C(12)-C(9)  | 115.6(5)  |
| C(20)-C(21)-C(24) | 121.4(5)  | O(13)-C(12)-O(12) | 126.0(6)  |
| C(22)-C(21)-C(24) | 119.4(5)  | O(13)-C(12)-C(9)  | 118.3(6)  |
| C(23)-C(22)-C(21) | 119.3(6)  | C(30)-O(16)-C(27) | 108.4(5)  |

|                   |          |                   |          |
|-------------------|----------|-------------------|----------|
| N(3)-C(23)-C(22)  | 119.9(6) | O(19)-C(25)-C(26) | 107.8(5) |
| O(1)-C(24)-O(2)   | 125.6(6) | O(19)-C(25)-C(27) | 110.3(5) |
| O(1)-C(24)-C(21)  | 118.4(5) | C(26)-C(25)-C(27) | 113.1(5) |
| O(2)-C(24)-C(21)  | 116.0(5) | O(17)-C(26)-C(25) | 112.2(5) |
| C(4)-N(1)-C(5)    | 122.2(6) | O(16)-C(27)-C(25) | 110.4(5) |
| O(3)-C(1)-O(4)    | 126.2(6) | O(16)-C(27)-C(28) | 104.0(5) |
| O(3)-C(1)-C(2)    | 117.9(6) | C(28)-C(27)-C(25) | 112.7(5) |
| O(4)-C(1)-C(2)    | 115.9(5) | O(18)-C(28)-C(27) | 118.1(5) |
| C(3)-C(2)-C(1)    | 119.1(5) | O(18)-C(28)-C(29) | 132.4(6) |
| C(3)-C(2)-C(6)    | 120.1(6) | C(29)-C(28)-C(27) | 109.5(6) |
| C(6)-C(2)-C(1)    | 120.7(6) | O(14)-C(29)-C(28) | 134.7(6) |
| C(2)-C(3)-C(4)    | 118.9(6) | O(14)-C(29)-C(30) | 118.2(5) |
| N(1)-C(4)-C(3)    | 120.2(6) | C(28)-C(29)-C(30) | 107.1(6) |
| N(1)-C(5)-C(6)    | 120.3(6) | O(15)-C(30)-O(16) | 120.5(6) |
| C(5)-C(6)-C(2)    | 118.3(6) | O(15)-C(30)-C(29) | 128.5(6) |
| C(16)-O(7)-C(15)  | 108.9(5) | O(16)-C(30)-C(29) | 111.0(5) |
| O(6)-C(13)-C(14)  | 134.2(6) | C(36)-O(25)-C(33) | 108.4(5) |
| O(6)-C(13)-C(16)  | 118.5(5) | O(20)-C(31)-C(32) | 111.4(5) |
| C(14)-C(13)-C(16) | 107.4(6) | O(21)-C(32)-C(31) | 106.5(5) |
| O(8)-C(14)-C(13)  | 133.7(6) | O(21)-C(32)-C(33) | 111.2(5) |
| O(8)-C(14)-C(15)  | 116.6(5) | C(31)-C(32)-C(33) | 113.2(5) |
| C(13)-C(14)-C(15) | 109.5(5) | O(25)-C(33)-C(32) | 112.2(5) |
| O(7)-C(15)-C(14)  | 104.1(5) | O(25)-C(33)-C(34) | 104.1(4) |
| O(7)-C(15)-C(17)  | 110.6(5) | C(34)-C(33)-C(32) | 112.1(5) |
| C(14)-C(15)-C(17) | 116.0(6) | O(22)-C(34)-C(33) | 116.9(5) |
| O(5)-C(16)-O(7)   | 121.3(6) | O(22)-C(34)-C(35) | 133.9(6) |
| O(5)-C(16)-C(13)  | 128.6(6) | C(35)-C(34)-C(33) | 109.1(5) |
| O(7)-C(16)-C(13)  | 110.1(5) | O(23)-C(35)-C(34) | 134.0(6) |
| O(9)-C(17)-C(15)  | 110.4(5) | O(23)-C(35)-C(36) | 118.2(5) |
| O(9)-C(17)-C(18)  | 110.7(6) | C(34)-C(35)-C(36) | 107.8(5) |
| C(18)-C(17)-C(15) | 110.3(6) | O(24)-C(36)-O(25) | 120.1(6) |
| O(10)-C(18)-C(17) | 118.7(8) | O(24)-C(36)-C(35) | 129.3(6) |
| O(11)-C(18)-C(17) | 116.0(7) | O(25)-C(36)-C(35) | 110.6(5) |
| C(9)-C(8)-C(7)    | 118.9(6) | C(11)-N(2)-C(7)   | 123.0(6) |
| C(8)-C(9)-C(10)   | 120.2(6) | N(2)-C(7)-C(8)    | 119.5(6) |
| C(8)-C(9)-C(12)   | 119.9(6) |                   |          |

---

**Table S2.** Hydrogen bond length (Å) and bond angle (°).

| Hydrogen bond         | D...A     | D—H...A | Hydrogen bond         | D...A     | D—H...A |
|-----------------------|-----------|---------|-----------------------|-----------|---------|
| N(1)—H(1)...O(24A)    | 2.710(7)  | 173     | O(8)—H(8)...O(12B)    | 2.547(7)  | 147     |
| N(2)—H(2)...O(15B)    | 2.705(7)  | 163     | O(9)—H(9)...O(11B)    | 2.591(11) | 138     |
| N(3)—H(3)...O(5B)     | 2.766(8)  | 168     | O(14)—H(14)...O(3C)   | 2.560(8)  | 159     |
| O(6)—H(6)...O(13B)    | 2.647(7)  | 159     | O(17)—H(17A)...O(18D) | 2.759(7)  | 159     |
| O(8)—H(8)...O(12B)    | 2.547(7)  | 147     | O(18)—H(18)...O(4C)   | 2.459(7)  | 152     |
| O(9)—H(9)...O(11B)    | 2.591(11) | 138     | O(19)—H(19)...O(17B)  | 2.700(7)  | 172     |
| O(14)—H(14)...O(3C)   | 2.560(8)  | 159     | O(20)—H(20)...O(12)   | 2.788(7)  | 153(11) |
| O(17)—H(17A)...O(18D) | 2.759(7)  | 159     | O(21)—H(21)...O(20B)  | 2.728(7)  | 173(7)  |
| O(18)—H(18)...O(4C)   | 2.459(7)  | 152     | O(22)—H(22)...O(2E)   | 2.524(7)  | 156     |
| N(1)—H(1)...O(24A)    | 2.710(7)  | 173     | O(23)—H(23)...O(1E)   | 2.622(7)  | 158     |
| N(2)—H(2)...O(15B)    | 2.705(7)  | 163     | O(6)—H(6)...O(13B)    | 2.647(7)  | 159     |
| N(3)—H(3)...O(5B)     | 2.766(8)  | 168     |                       |           |         |

A: -1/2+x,-1/2+y,z; B: x,-1+y,z; C: 1-x,-1+y,1-z; D: 3/2-x,1/2+y,1-z; E: 1-x,-1+y,-z.
